# Supplementary material
Source: publisher figshare collection journal article supplement (https://frontiersin.figshare.com/ndownloader/files/22533467)
Supplement: Supplementary file [file 22533467]

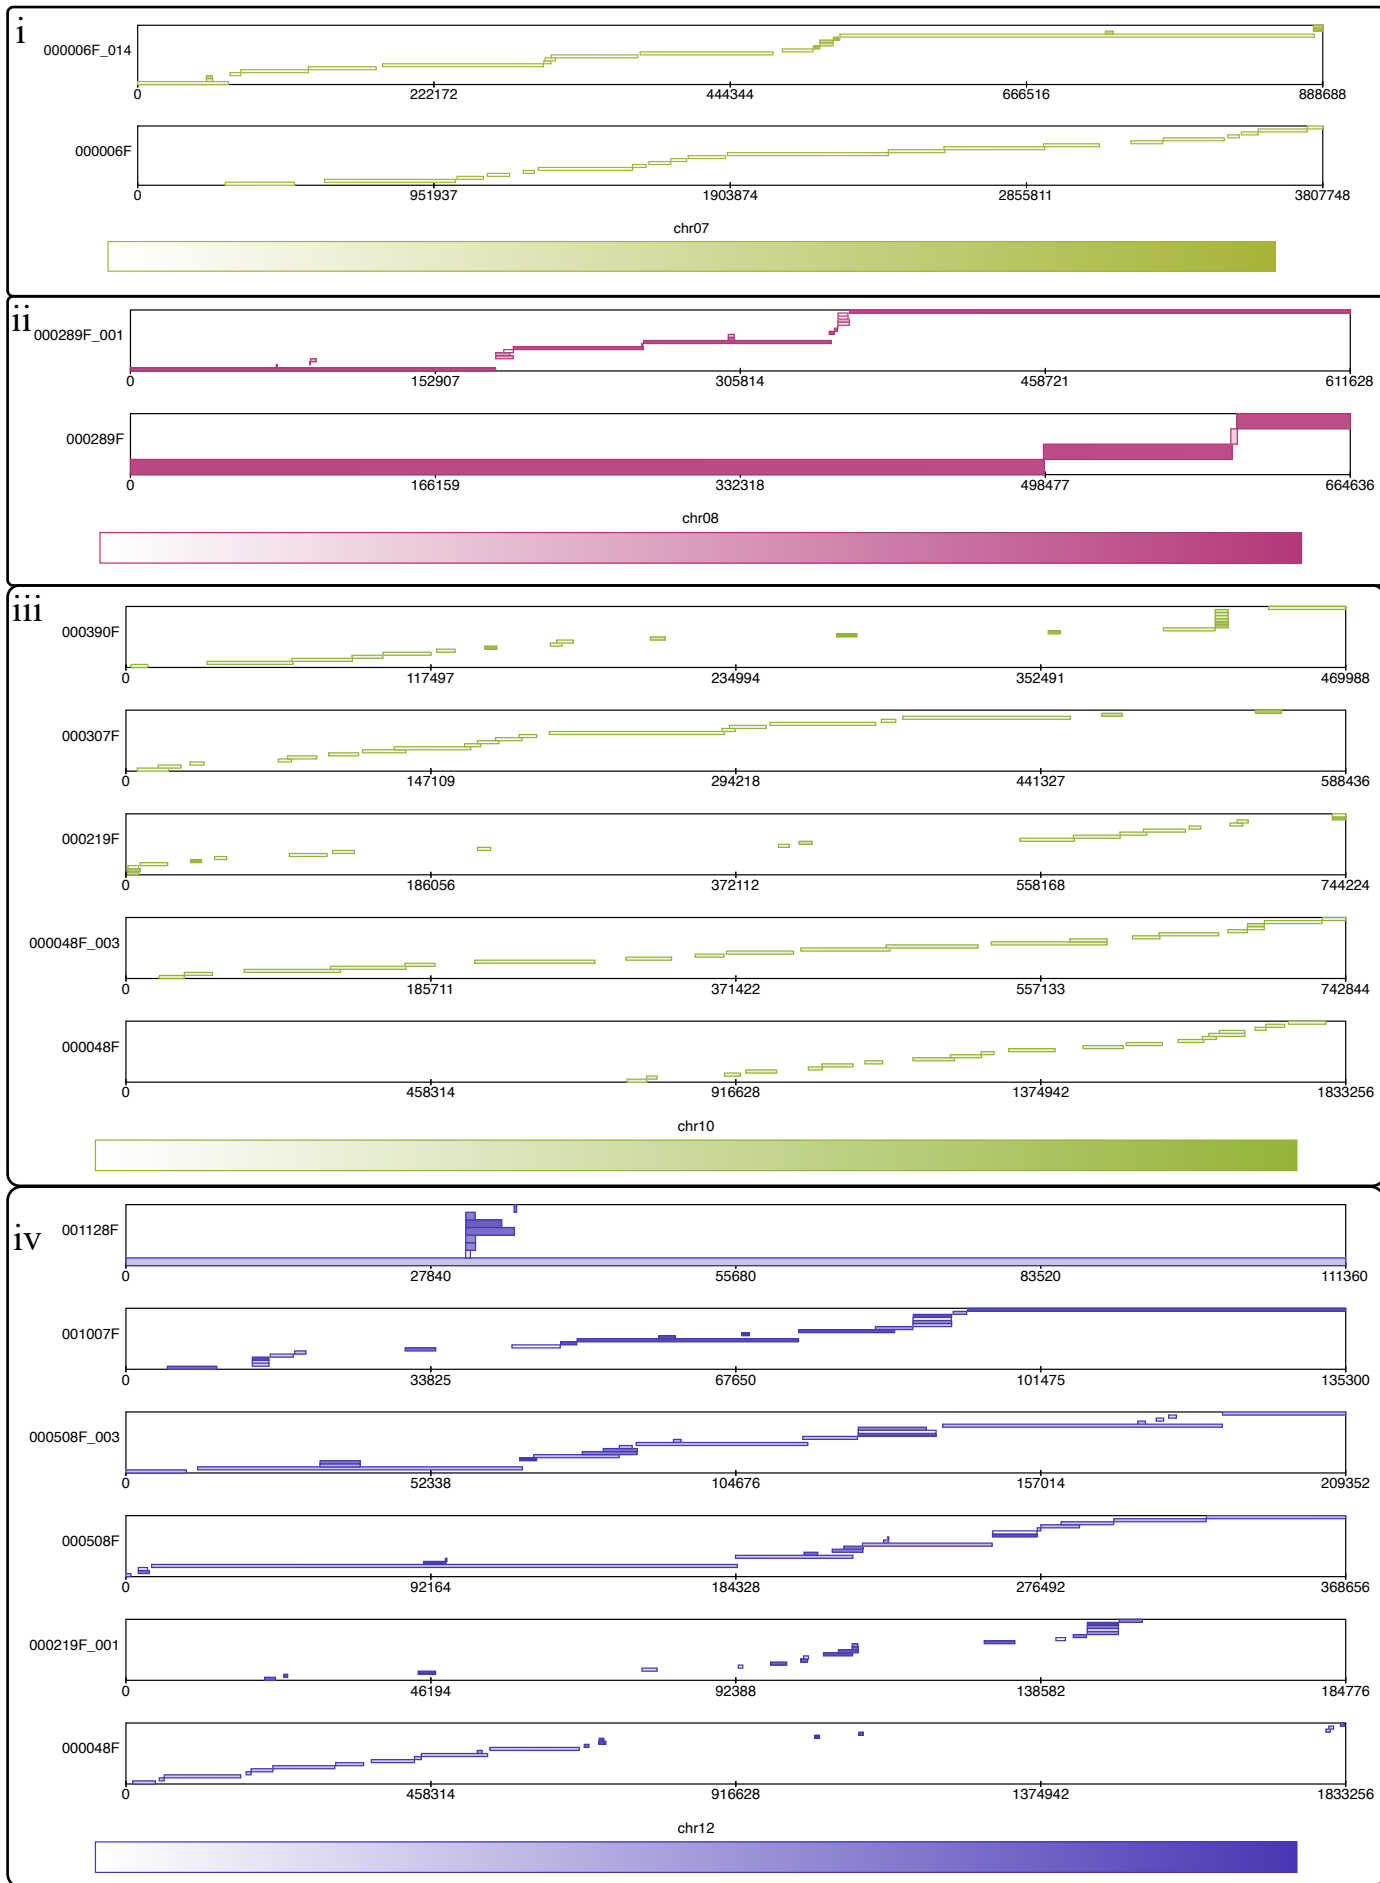

**Supplementary Data Sheet 1A.** Alvis contig alignments for Chardonnay (CH) to PN40024 chr. 07 (i), chr. 08 (ii), chr. 10 (iii) and chr12 (iv)

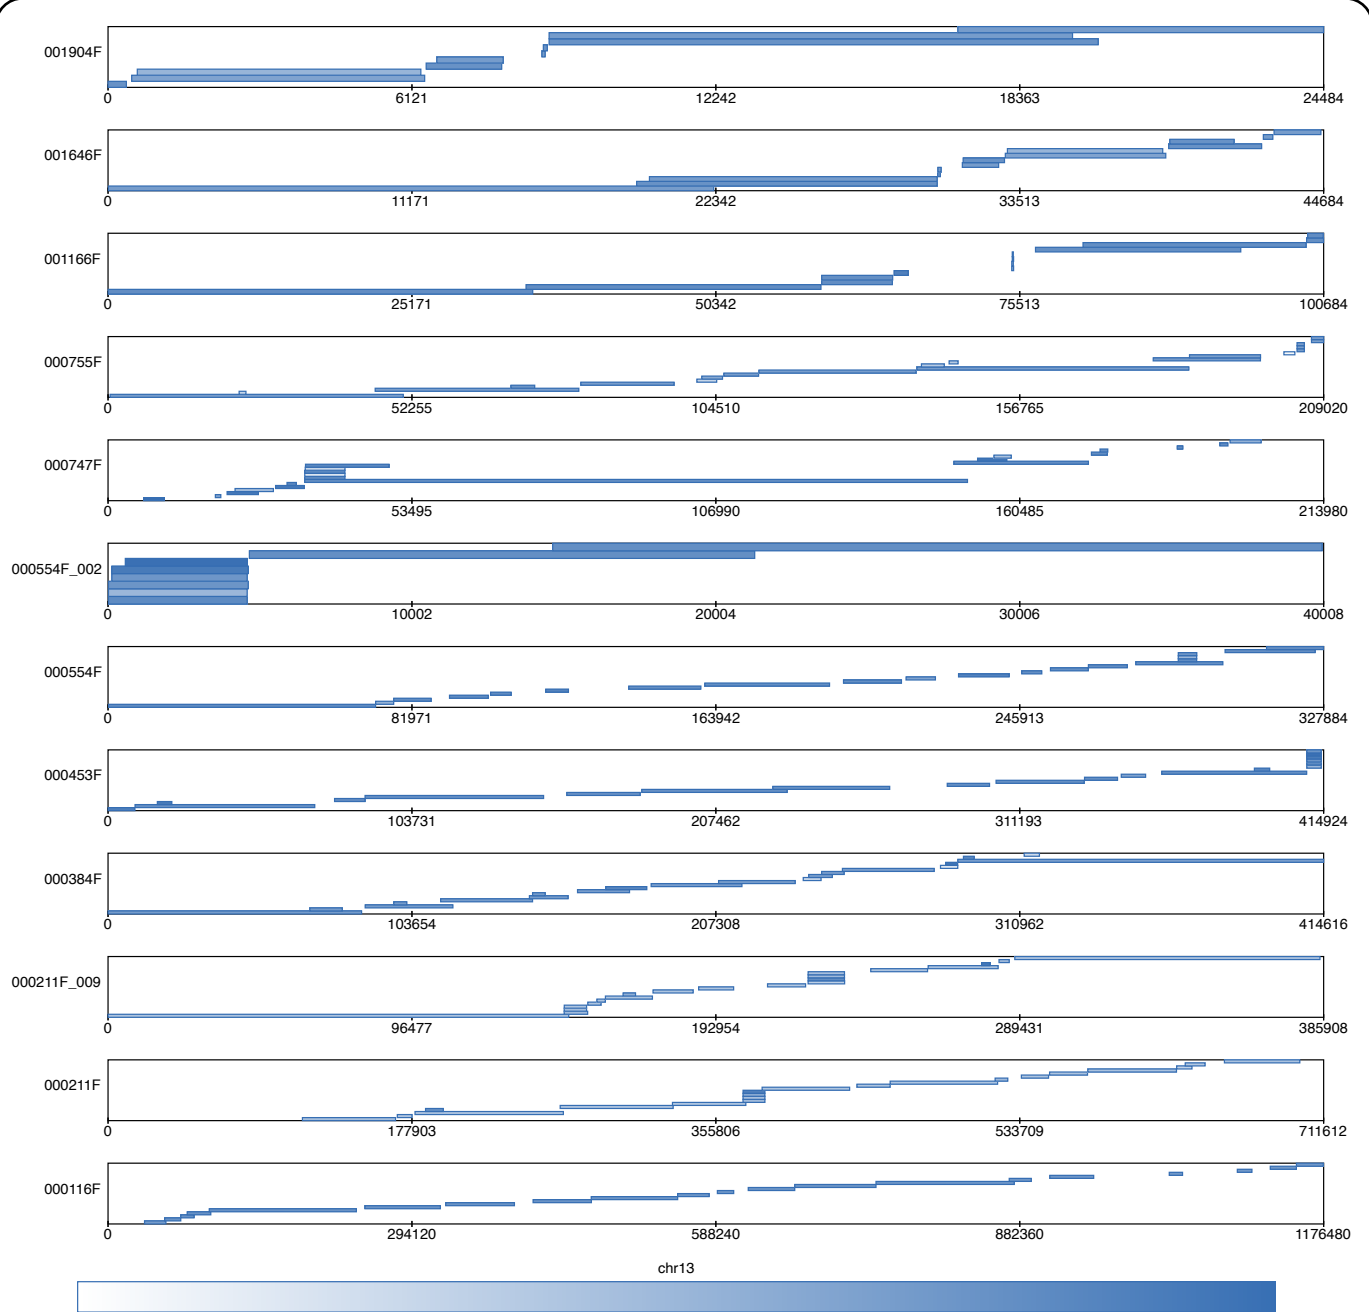

**Supplementary Data Sheet 1B.** Alvis contig alignments for Chardonnay (CH) to PN40024 chr. 13

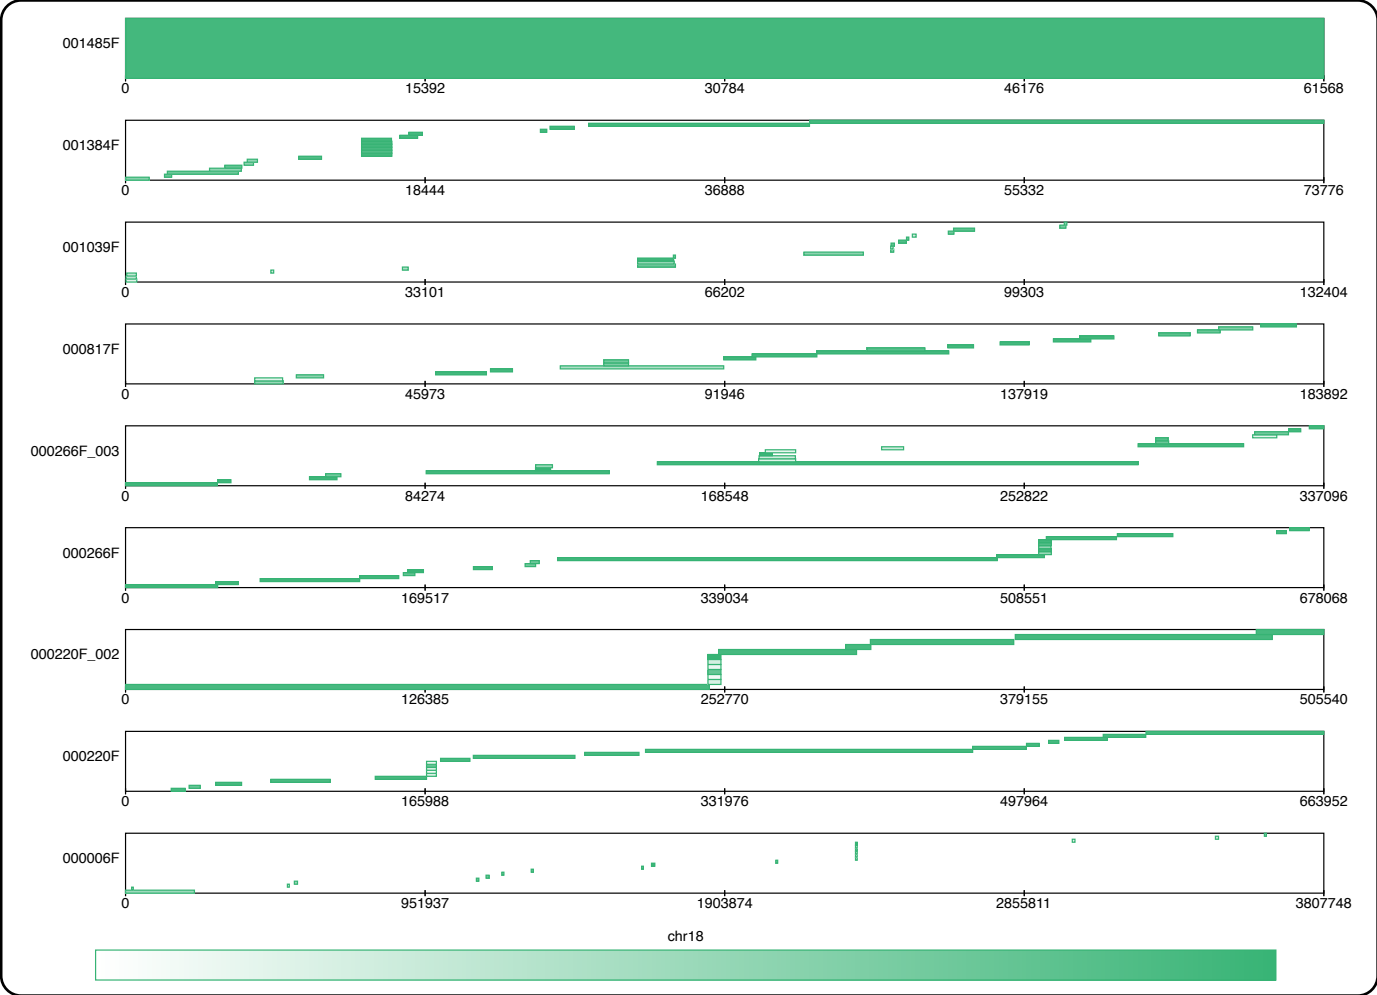

**Supplementary Data Sheet 1C.** Alvis contig alignments for Chardonnay (CH) to PN40024 chr. 18

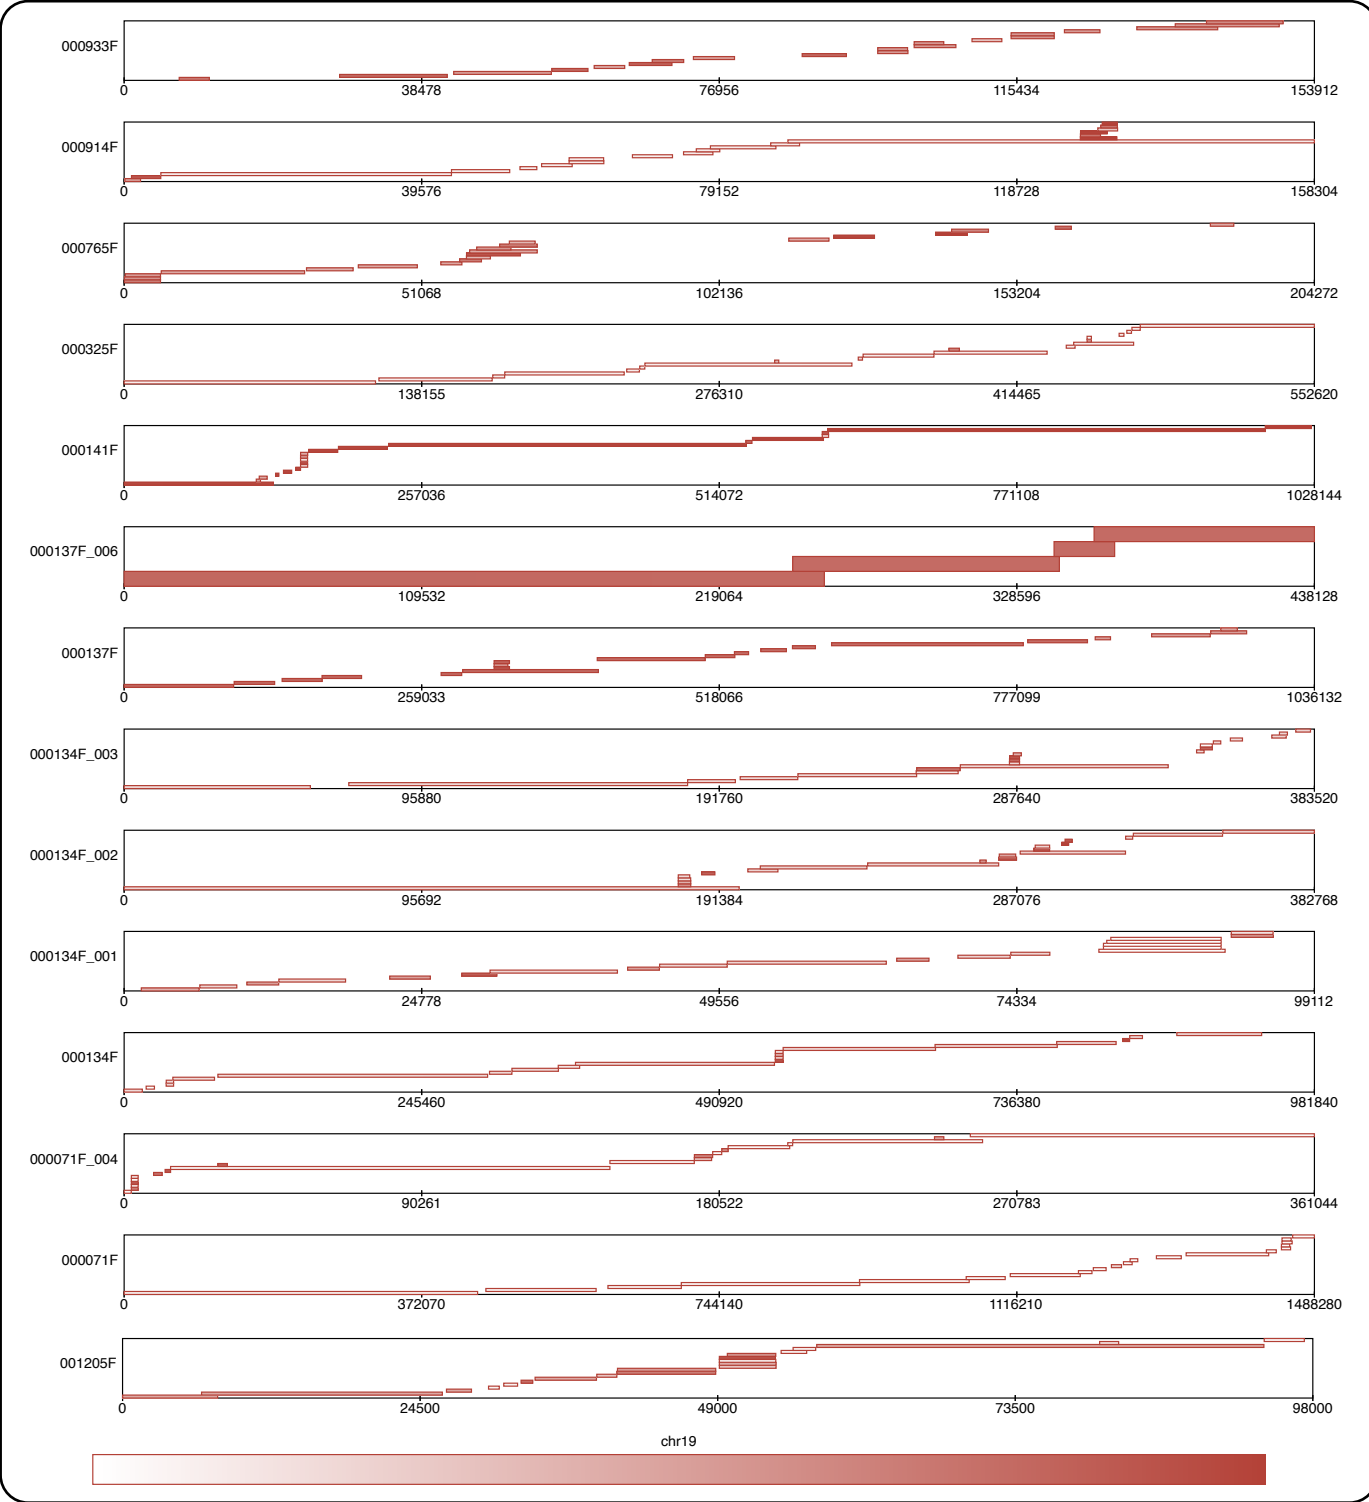

**Supplementary Data Sheet 1D.** Alvis contig alignments for Chardonnay (CH) to PN40024 chr. 19

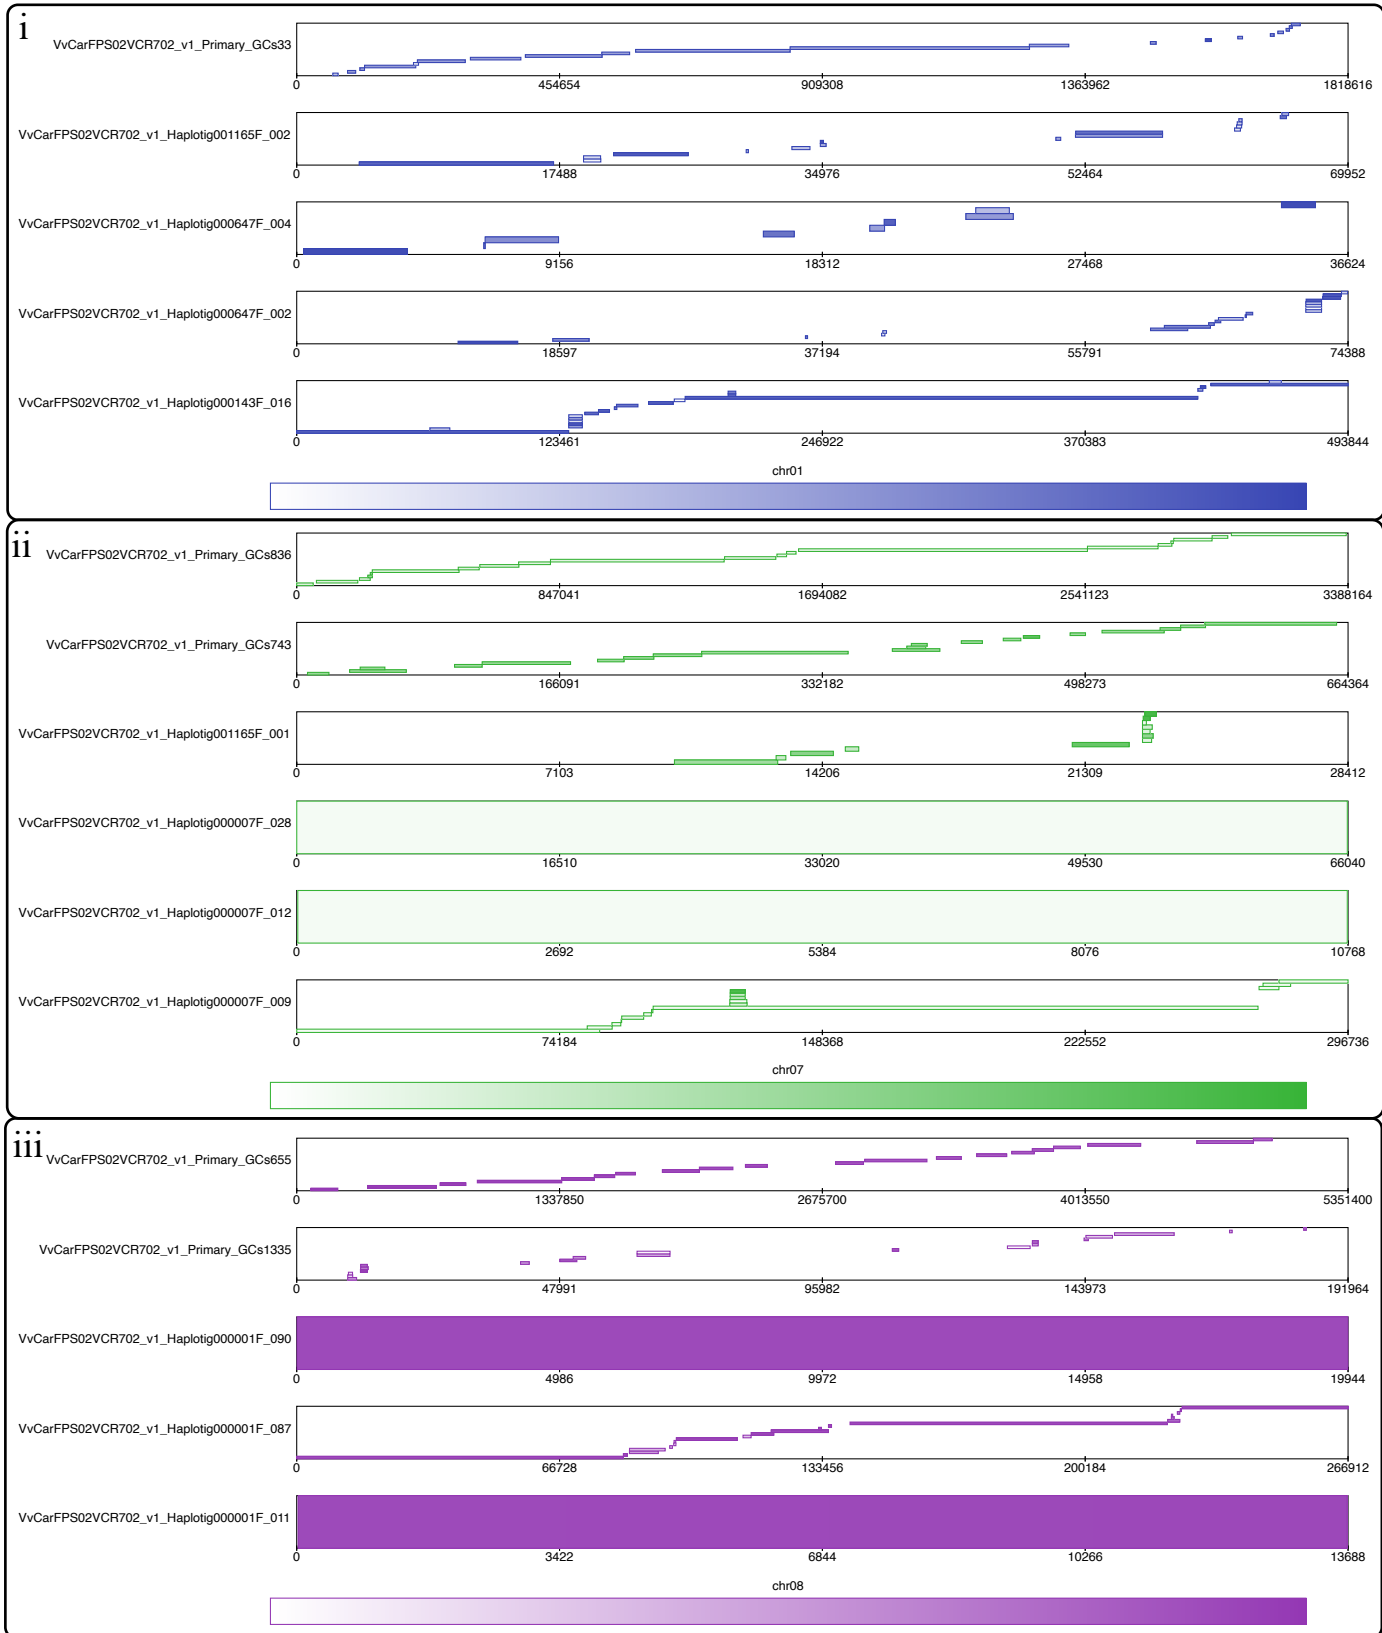

**Supplementary Data Sheet 1E.** Alvis contig alignments for Carménère (CR) to PN40024 chr. 01 (i), chr. 07 (ii) and chr. 08 (iii)

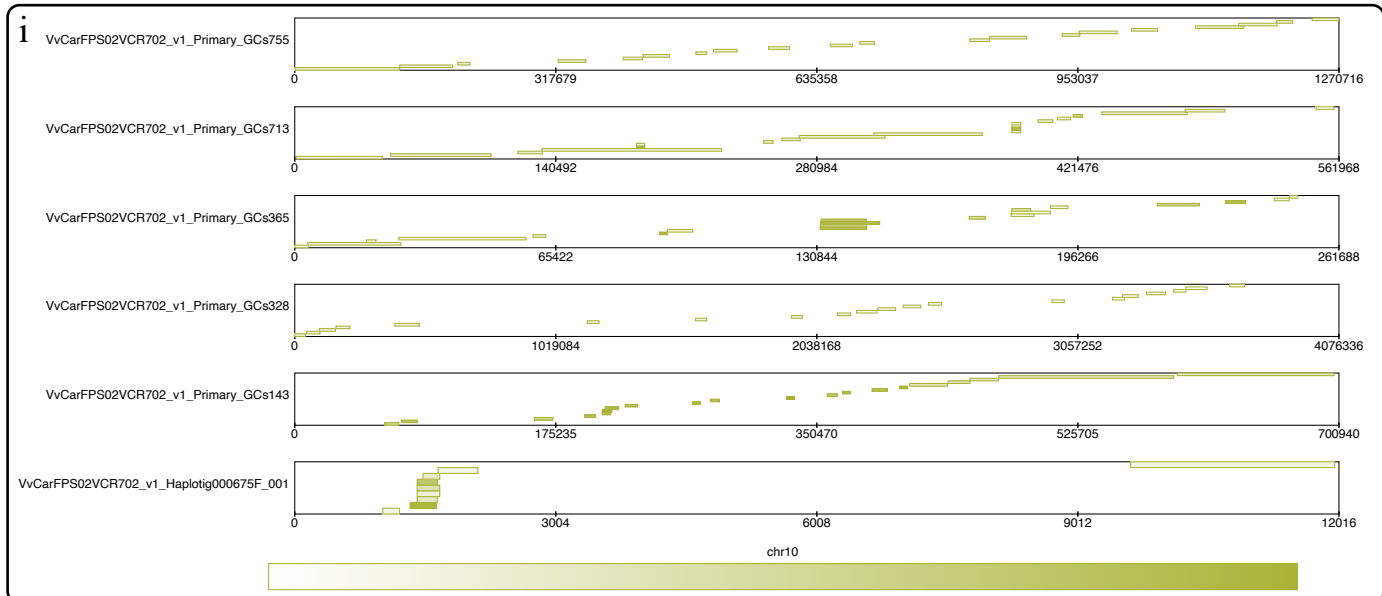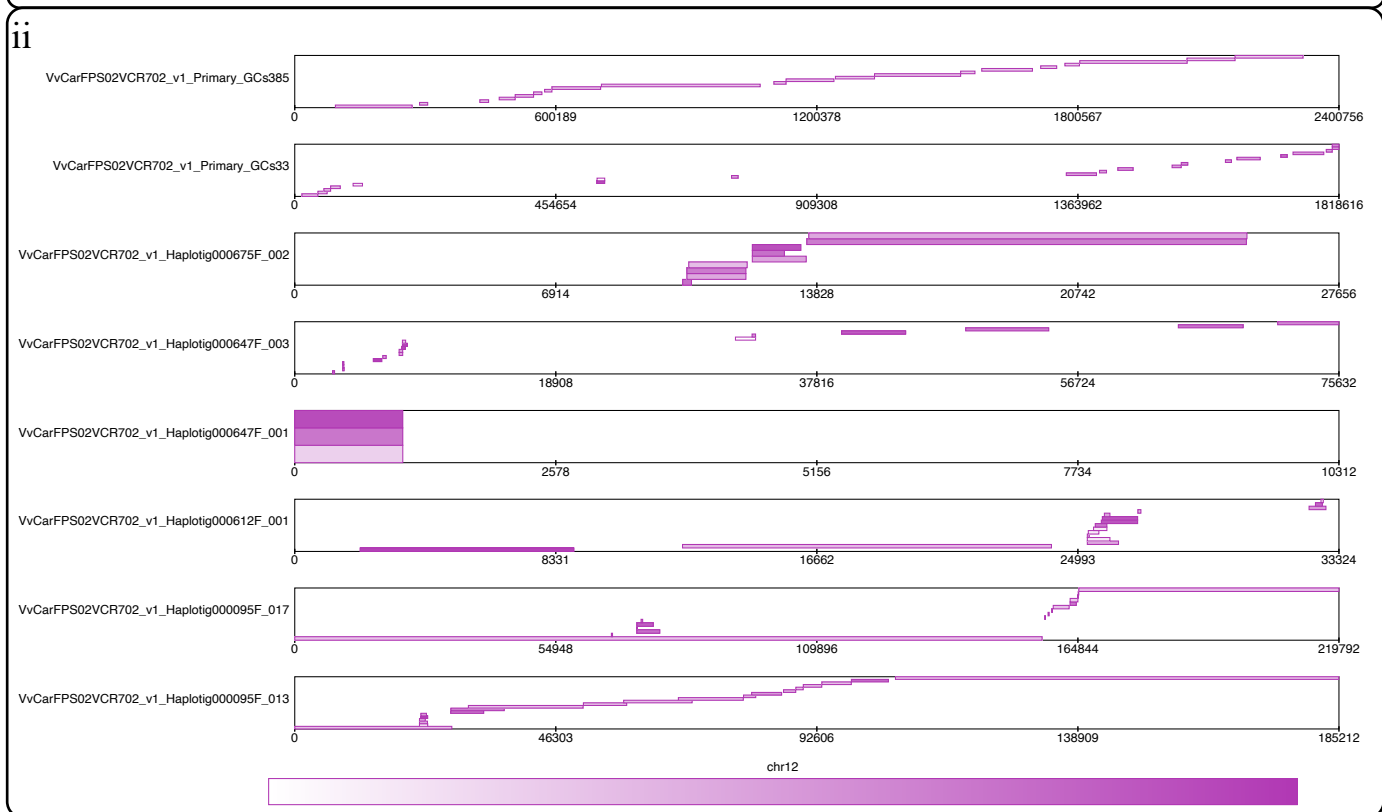

**Supplementary Data Sheet 1F.** Alvis contig alignments for Carménère (CR) to PN40024 chr. 10 (i) and chr. 12 (ii)

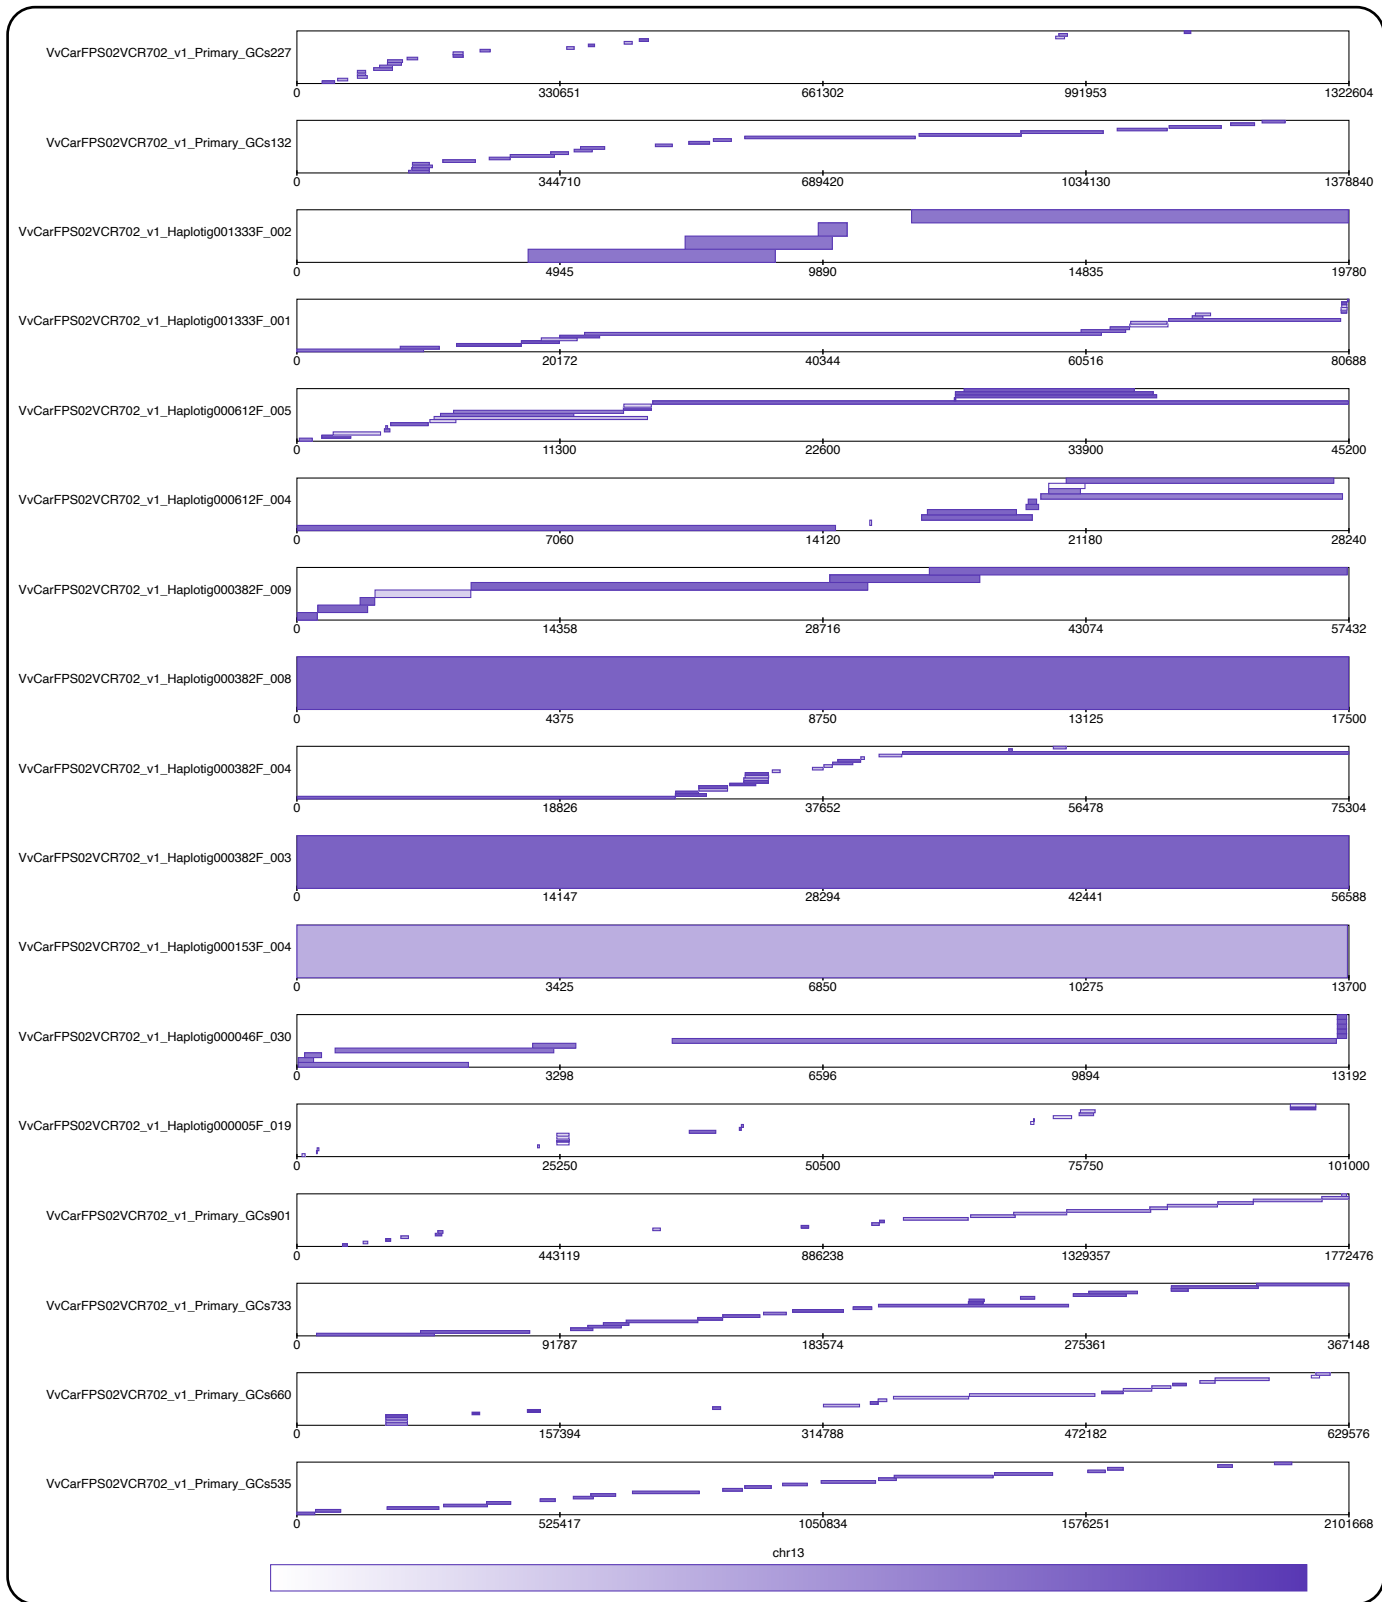

**Supplementary Data Sheet 1G.** Alvis contig alignments for Carménère (CR) to PN40024 chr. 13

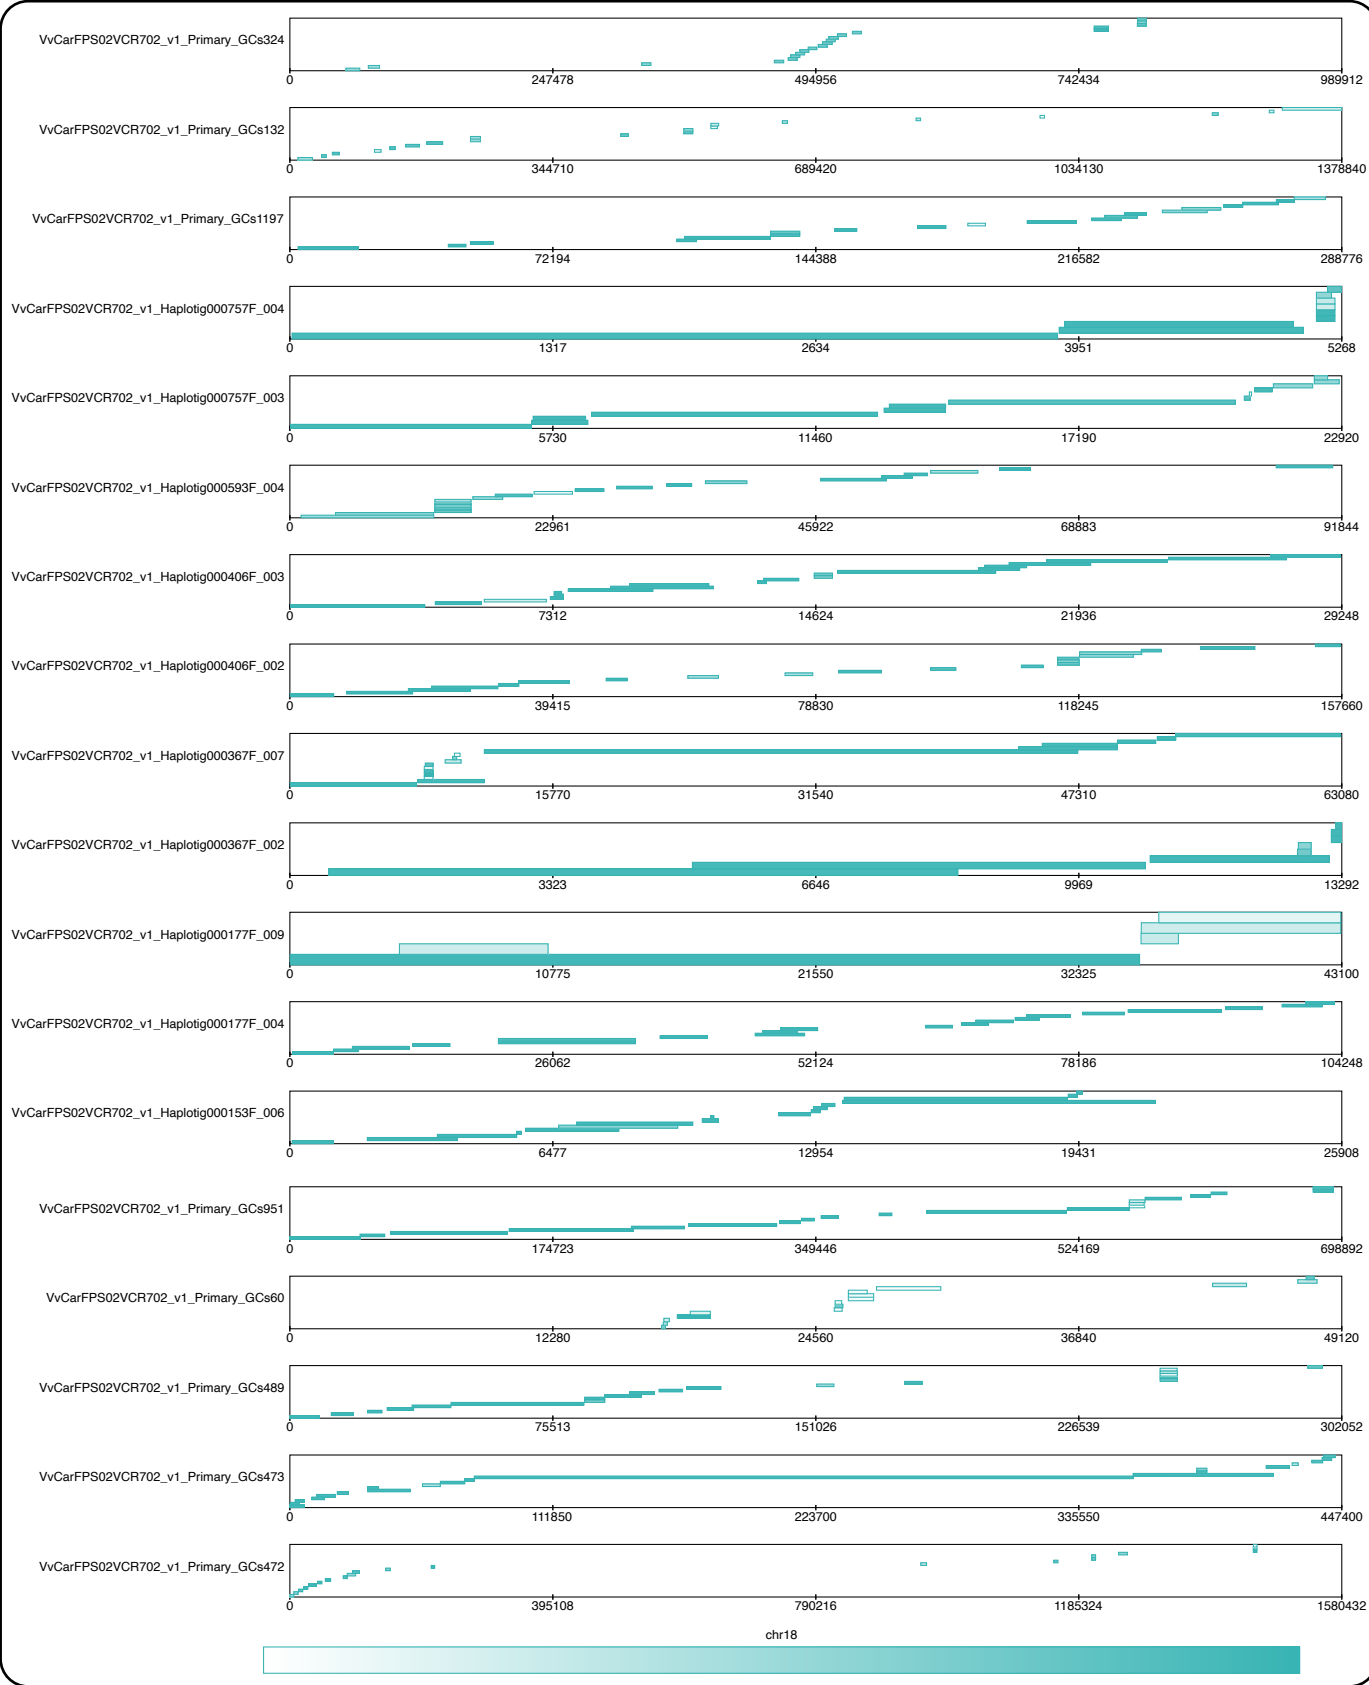

Supplementary Data Sheet 1H. Alvis contig alignments for Carménère (CR) to PN40024 chr. 18.



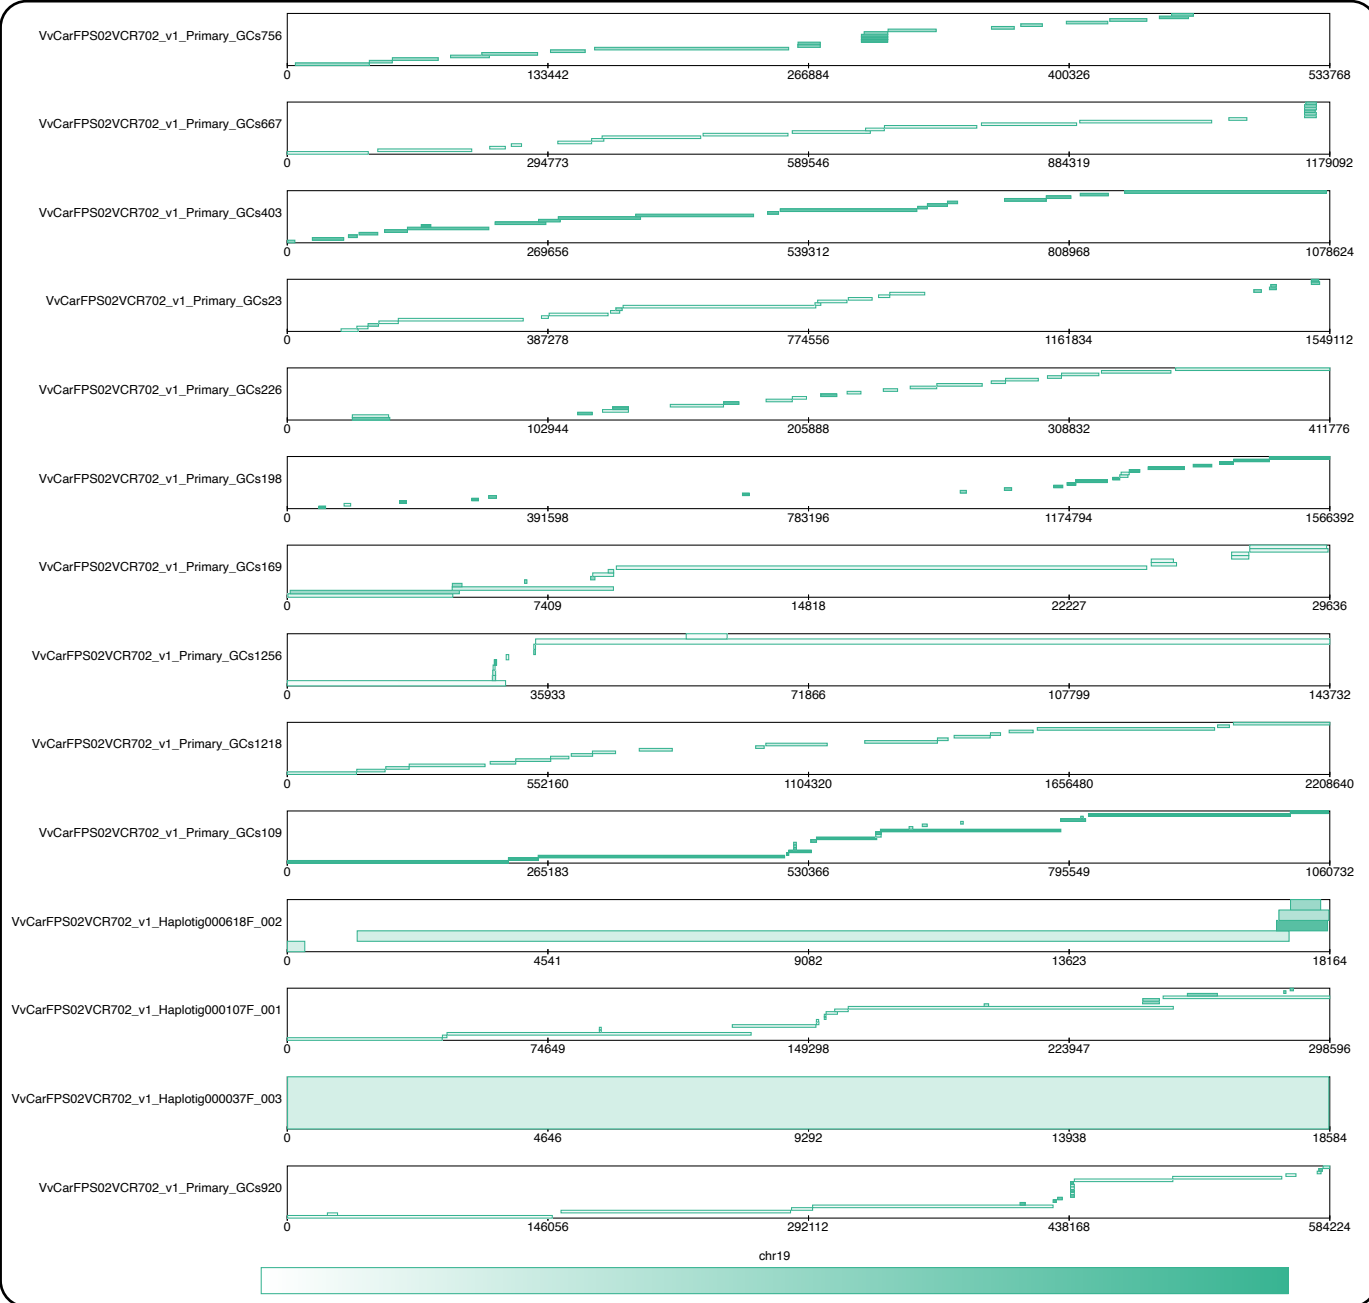

**Supplementary Data Sheet 1I.** Alvis contig alignments for Carménère (CR) to PN40024 chr. 19

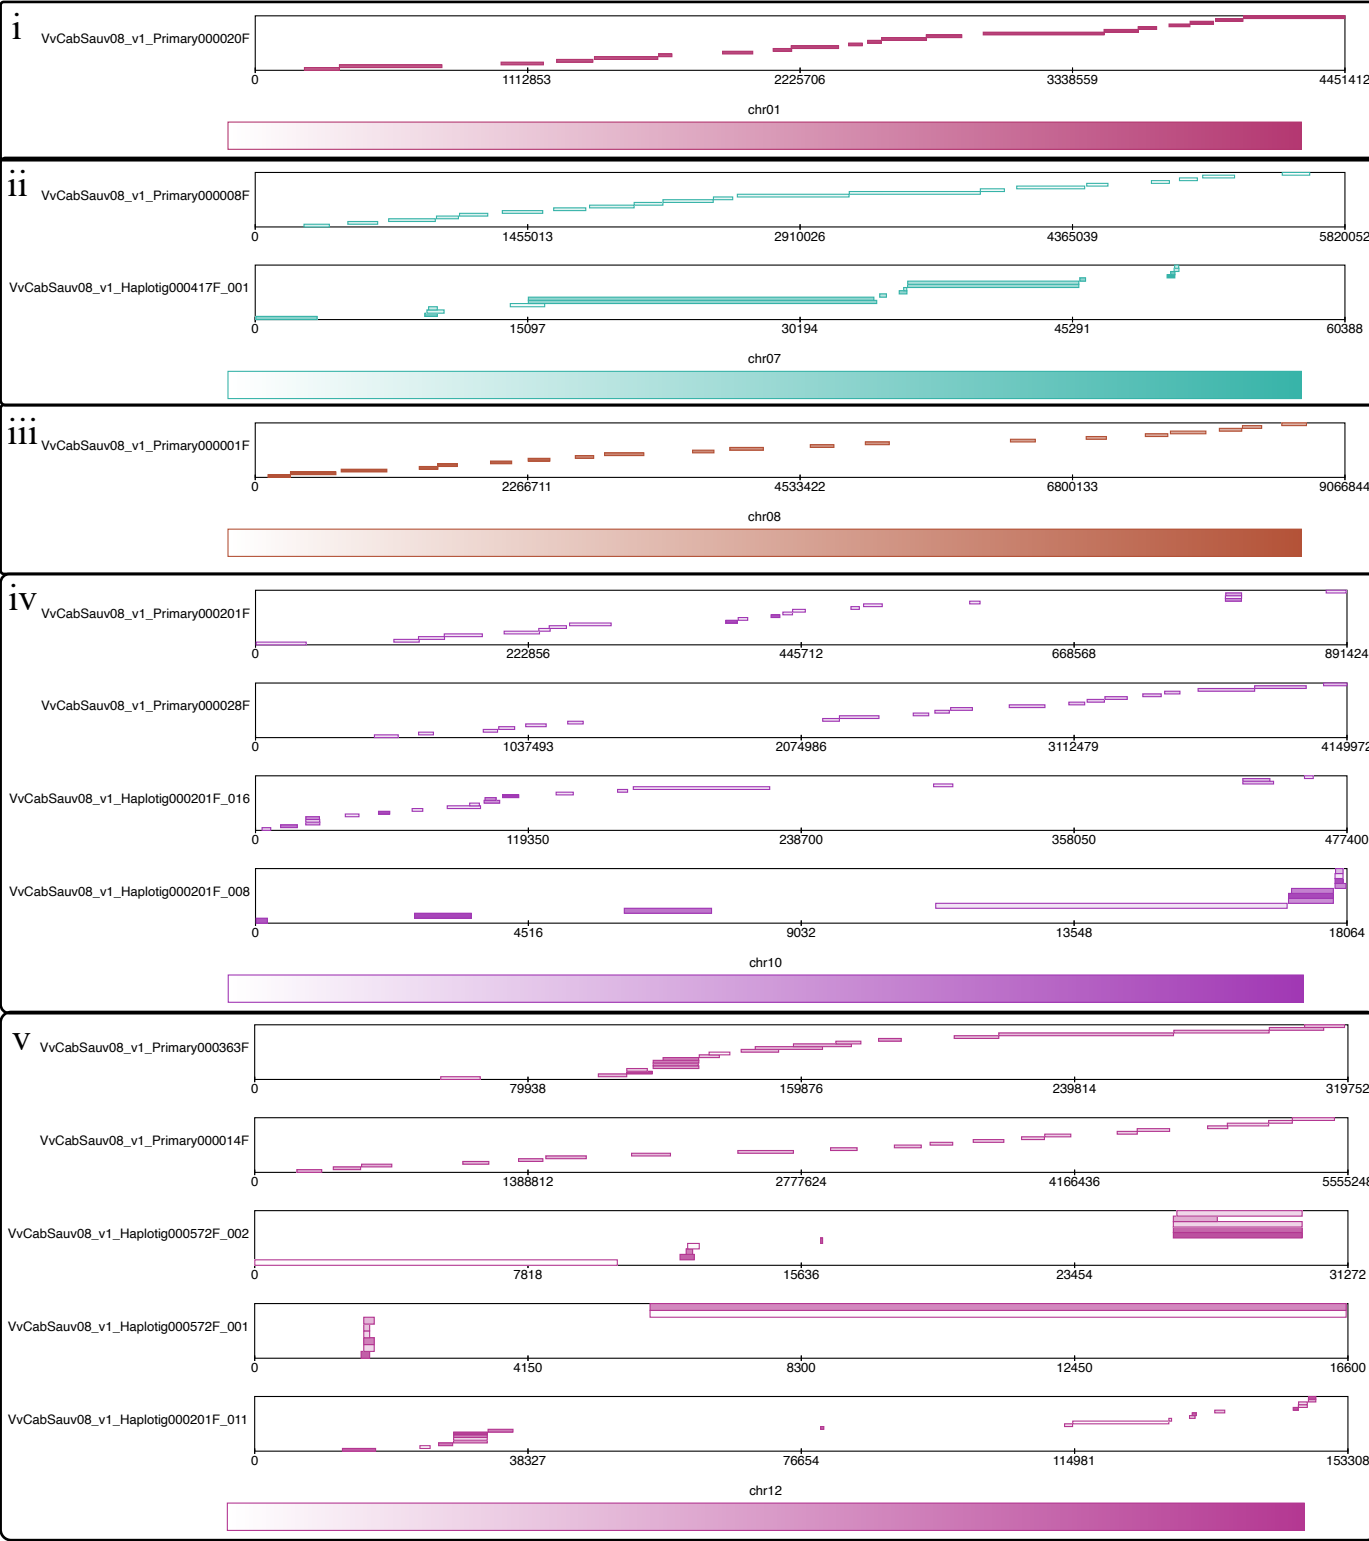

**Supplementary Data Sheet 1J.** Alvis contig alignments for Cabernet Sauvignon (CS) to PN40024 chr. 01, (i), chr. 07 (ii), chr. 08 (iii), chr. 10 (iv), chr. 12 (v)

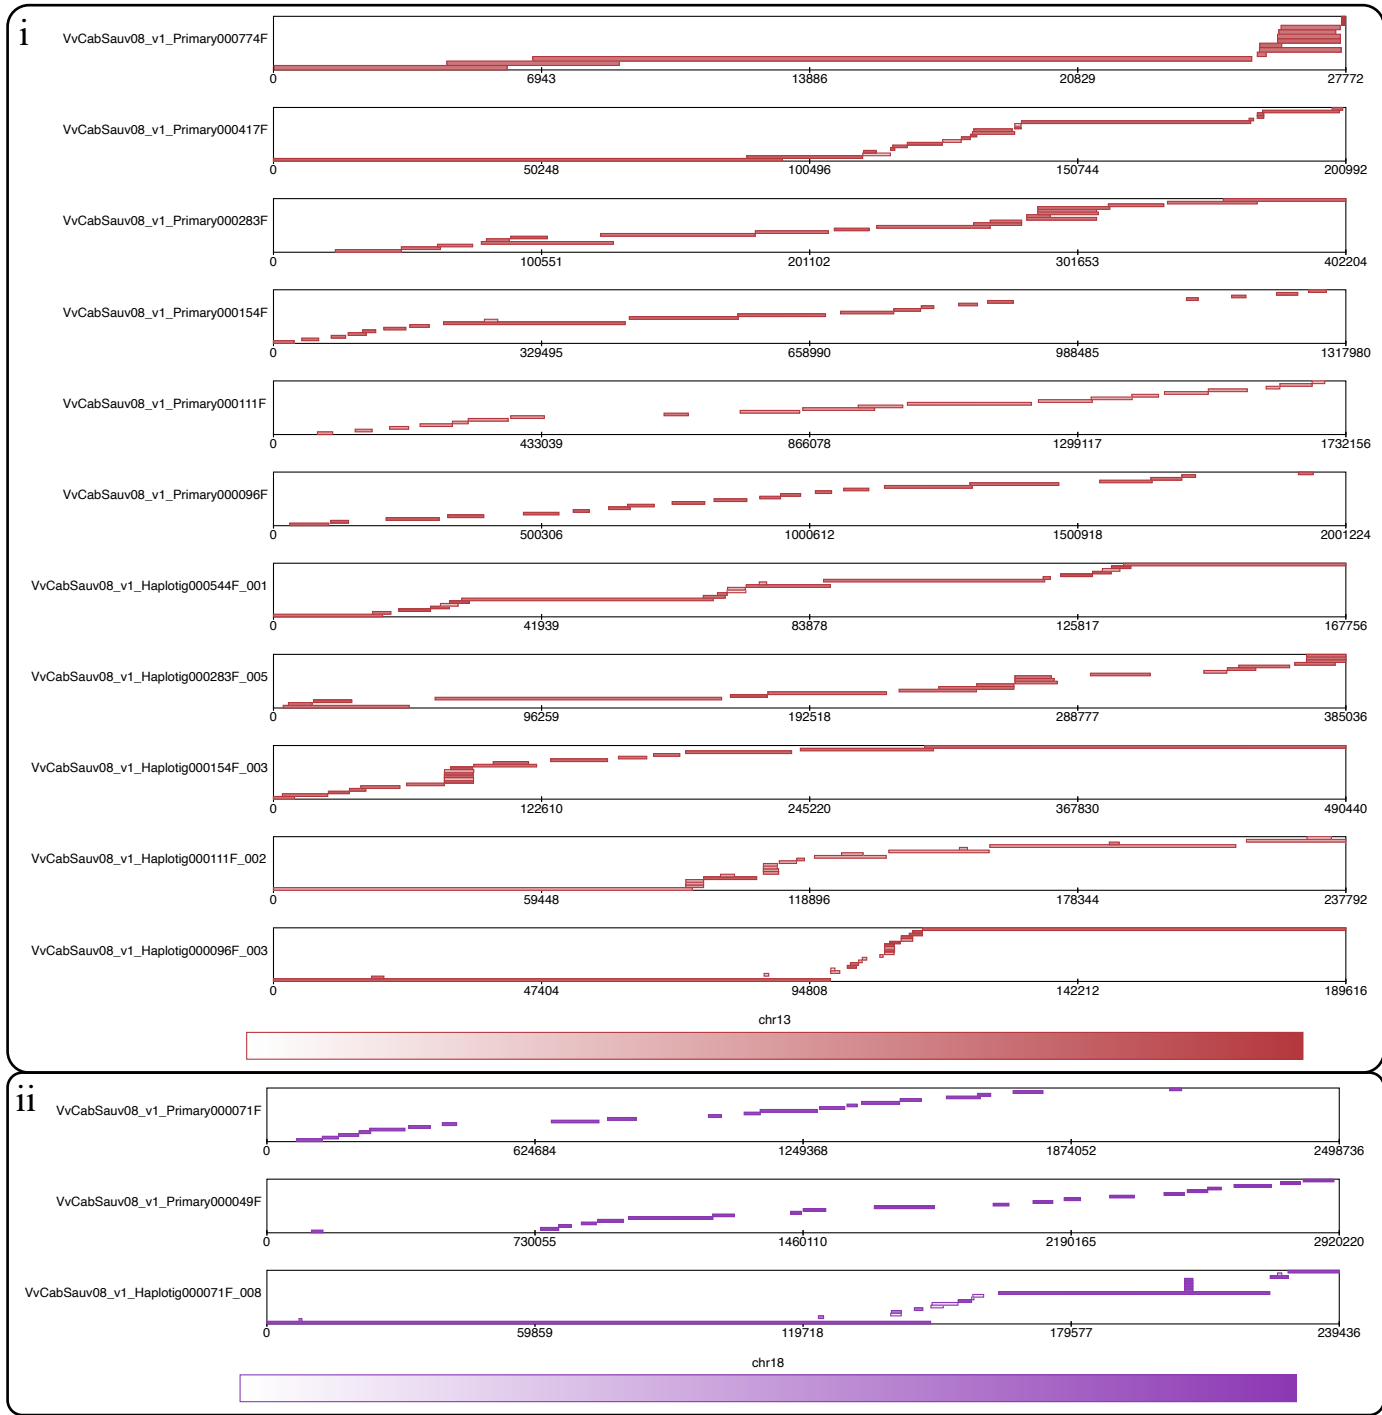

**Supplementary Data Sheet 1K.** Alvis contig alignments for Cabernet Sauvignon (CS) to PN40024 chr. 13, (i) and chr. 18 (ii).

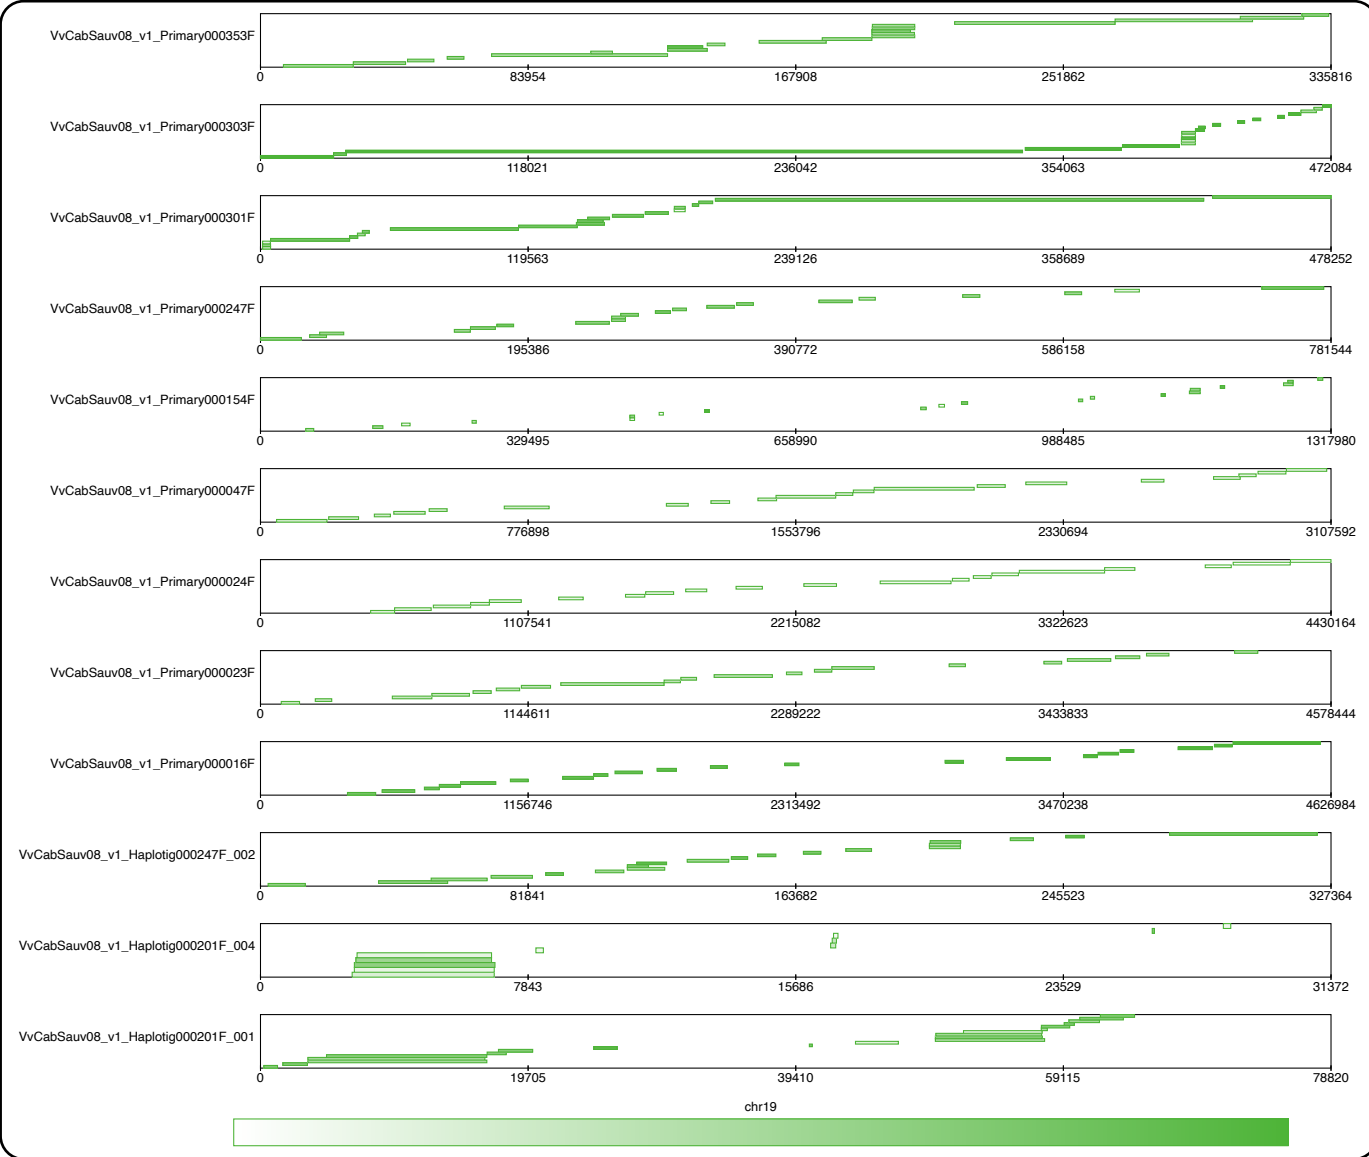

**Supplementary Data Sheet 1L.** Alvis contig alignments for Cabernet Sauvignon (CS) to PN40024 chr. 19
